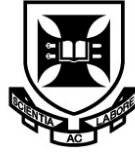

THE UNIVERSITY  
OF QUEENSLAND  
AUSTRALIA

# **Spatial Attention Enhances the Neural Representation of Invisible Signals Embedded in Noise**

Cooper A. Smout\*<sup>1</sup> and Jason B. Mattingley<sup>1,2</sup>

<sup>1</sup> Queensland Brain Institute, University of Queensland, Brisbane, QLD 4067 Australia

<sup>2</sup> School of Psychology, University of Queensland, Brisbane, QLD 4067 Australia

\* corresponding author:      QBI Building 79  
                                                 University of Queensland  
                                                 St Lucia QLD 4072  
                                                 Email: c.smout@uq.edu.au

This research was supported by the Australian Research Council (ARC) Centre of Excellence for Integrative Brain Function (ARC Centre Grant CE140100007). J.B.M was supported by an ARC Australian Laureate Fellowship (FL110100103). The authors declare no competing financial interests.

1 **Abstract**

2 Recent evidence suggests that voluntary spatial attention can affect neural processing of  
3 visual stimuli that do not enter conscious awareness (i.e. invisible stimuli), supporting the  
4 notion that attention and awareness are dissociable processes (Watanabe et al., 2011; Wyart,  
5 Dehaene, & Tallon-Baudry, 2012). To date, however, no study has demonstrated that these  
6 effects reflect enhancement of the neural representation of invisible stimuli *per se*, as  
7 opposed to other neural processes not specifically tied to the stimulus in question. In addition,  
8 it remains unclear whether spatial attention can modulate neural representations of invisible  
9 stimuli in direct competition with highly salient and visible stimuli. Here we developed a  
10 novel electroencephalography (EEG) frequency-tagging paradigm to obtain a continuous  
11 readout of human brain activity associated with visible and invisible signals embedded in  
12 dynamic noise. Participants ( $N = 23$ ) detected occasional contrast changes in one of two  
13 flickering image streams on either side of fixation. Each image stream contained a visible or  
14 invisible signal embedded in every second noise image, the visibility of which was titrated  
15 and checked using a two-interval forced-choice detection task. Steady-state visual-evoked  
16 potentials (SSVEPs) were computed from EEG data at the signal and noise frequencies of  
17 interest. Cluster-based permutation analyses revealed significant neural responses to both  
18 visible and invisible signals across posterior scalp electrodes. Control analyses revealed that  
19 these responses did not reflect a subharmonic response to noise stimuli. In line with previous  
20 findings, spatial attention increased the neural representation of visible signals. Crucially,  
21 spatial attention also increased the neural representation of invisible signals. As such, the  
22 present results replicate and extend previous studies by demonstrating that attention can  
23 modulate the neural representation of invisible signals that are in direct competition with  
24 highly salient masking stimuli.

25 **Introduction**

26 When viewing a cluttered visual scene, representations of the various objects compete for  
27 limited neural resources (Broadbent, 1958; Desimone & Duncan, 1995). Such ongoing neural  
28 competition can be biased by top-down mechanisms to facilitate the observer's behavioural  
29 goals (Beck & Kastner, 2009). For example, voluntarily allocating covert spatial attention to  
30 a specific region of the visual field can selectively boost neural representations of salient  
31 stimuli within that region (Hillyard & Anllo-Vento, 1998; Martinez et al., 1999; Müller et al.,  
32 1998). Interestingly, recent studies demonstrate that spatial attention can also affect neural  
33 processing of weak stimuli that do not enter awareness (equated here with the contents of  
34 conscious experience; Schurger et al., 2008; Wyart and Tallon-Baudry, 2008; Wyart et al.,  
35 2012). However, since attention encompasses a variety of neural mechanisms (for a review  
36 see Womelsdorf and Everling, 2015), it remains unclear which subcomponents activate  
37 during processing of invisible stimuli. In particular, no study to date has tied neural activity to  
38 specific invisible stimuli, and thus it remains unclear whether spatial attention enhances  
39 *neural representations* of invisible stimuli or merely activates other neural mechanisms not  
40 specific to neural representations *per se* (e.g. alerting, orienting, or suppression mechanisms).  
41 Evidence that spatial attention increases the neural representation of invisible stimuli, without  
42 a corresponding increase in object awareness, would provide clear evidence that attention and  
43 awareness dissociate at the level of stimulus representations. Furthermore, previous studies  
44 presented invisible stimuli at different times or locations to highly visible masking stimuli,  
45 and thus it remains unclear how spatial attention treats neural representations of invisible  
46 signals that are in direct competition with visible stimuli. Such research is necessary if we are  
47 to understand how top-down mechanisms in the visual system allocate limited resources to  
48 competing stimuli with different levels of bottom-up signal strength (i.e. salience). In the  
49 present study, we used electroencephalography (EEG) to measure neural representations of

50 visible and invisible stimuli embedded in highly salient noise, and assessed the effect of  
51 voluntary covert spatial attention on these neural representations.

52 To investigate these questions, it is necessary to disambiguate relatively weak neural activity  
53 arising from subjectively invisible targets from the stronger responses associated with highly  
54 salient and spatially coincident masking stimuli. To date, however, no such technique has  
55 been devised to effectively distinguish the neural signatures of these weak and strong sensory  
56 inputs. If a train of stimuli is presented at a fixed frequency, however, a stable oscillatory  
57 response is produced in the brain that can be observed in the frequency-domain in EEG  
58 recordings (the steady-state visual-evoked potential; SSVEP; Regan, 1966). Multiple stimuli  
59 in a visual scene can thus be ‘frequency tagged’ when flickered at unique frequencies, an  
60 approach that has proven useful for exploring the effects of attention on visible stimuli at  
61 separate spatial locations (Norcia, Appelbaum, Ales, Cottareau, & Rossion, 2015).

62 A recent study by Ales et al. (2012) pioneered a novel SSVEP technique for measuring  
63 neural representations of signals embedded in dynamic noise. In their study, Ales et al.  
64 presented participants with streams of luminance- and amplitude-matched noise images at a  
65 rate of 6 Hz. Every second image contained a face stimulus embedded in noise, and the  
66 coherence of the face was gradually increased over the duration of the trial until participants  
67 indicated they had detected it. Crucially, power at the frequency of signal presentation (3 Hz,  
68 representing the face in every second image) was found only in trials that contained  
69 embedded faces, and not in trials in which the face was replaced by another noise display.  
70 Thus, the neural activity at the frequency of the embedded signal serves as a useful measure  
71 of the neural representation of that stimulus, irrespective of any other neural processes that  
72 may be operating concurrently.

73 Using the same principle as Ales et al. (2012), we developed a novel paradigm to obtain a  
74 continuous readout of neural activity associated with visible and invisible signals embedded  
75 in dynamic noise. Participants directed attention to one of a pair of flickering image streams  
76 to detect occasional contrast changes, and we assessed the effect of spatial attention on neural  
77 representations of both visible and invisible signals. We employed a two-interval, forced-  
78 choice signal detection task to confirm that appropriate levels of signal coherence were  
79 selected for visible and invisible signals. To anticipate, we found that spatial attention  
80 enhanced neural representations of both visible and invisible signals, suggesting that attention  
81 can bias neural activity in favour of invisible stimuli that are in spatial and temporal  
82 competition with highly salient masking noise.

### 83 **Materials and Methods**

#### 84 *Participants*

85 Twenty-three healthy participants (11 female, mean age: 22.65 years) with normal or  
86 corrected-to-normal vision were recruited via an online research participation scheme at The  
87 University of Queensland. Participants completed a safety-screening questionnaire and  
88 provided written informed consent prior to commencement of the study, which was approved  
89 by The University of Queensland Human Research Ethics Committee.

#### 90 *Stimuli and apparatus*

91 The method of stimulus generation (*Figure 1*) was adapted from Ales, Farzin, Rossion and  
92 Norcia (2012) to maintain the same average power distribution and luminance across all  
93 images. All images were created from the same seed image consisting of an annulus (seven  
94 cycles, inner diameter:  $4.67^\circ$  of visual angle, outer diameter:  $14^\circ$  of visual angle) on a  
95 uniform mid-grey square background ( $14^\circ$  of visual angle; *Figure 1a*, top left). The phase  
96 distribution of the seed image was randomised to create a noise background with the same

97 amplitude distribution as the seed image (*Figure 1a*, bottom left). The annulus and noise  
98 background were then combined using complementary spatial blurring masks (which  
99 spanned from the annulus edges to  $2^\circ$  of visual angle within each edge; *Figure 1a*, top and  
100 bottom right) to create an exemplar image consisting of a fully coherent annulus on a noise  
101 background (*Figure 1a*, center right). The phase distribution of this exemplar image was then  
102 ‘scrambled’ (randomized) to the extent required by the trial sequence (see *Stimulation*  
103 *Protocol*, below): phase angles of ‘noise images’ were scrambled completely (*Figure 1b*,  
104 bottom), whereas phase angles of ‘signal images’ were linearly interpolated between the  
105 original phase angles and a random phase distribution (*Figure 1b*, top and middle). Because  
106 phase angles are circular, interpolation of phase angles was computed in the direction of least  
107 difference to maintain a uniform phase distribution (Ales, Farzin, & Norcia, 2012).

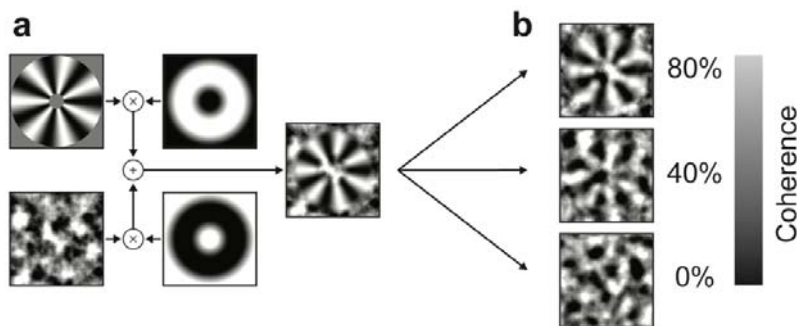

108  
109 **Figure 1.** Stimulus generation. (a) Phase distribution of the signal (annulus, top left) was scrambled  
110 to create a noise background that was different for every image (bottom left). Signal and noise images  
111 were combined via inverse masks to create an exemplar image (centre right), which was then phase-  
112 scrambled according to the desired level of signal coherence. (b) Example images containing visible  
113 signal (top), invisible signal (middle), or noise only (bottom).

114 Thus, all images contained some amount of ‘noise’, which represented the (partially or  
115 completely) randomized phase distribution of its exemplar image. Signal images contained  
116 noise both ‘behind’ the annulus (in the exemplar background), as well as ‘in front of’ the  
117 annulus, since the phase-structure of the exemplar image was partially randomized in the  
118 final image creation step. Since each exemplar image was created using a unique noise

119 background, the only consistent structure between any two images was the signal itself,  
120 subject to its level of phase coherence. Furthermore, since all images – both signal and noise  
121 – were created from the same seed annulus image, all images in the experiment shared the  
122 same low-level characteristics, including amplitude and luminance.

123 Stimuli were presented on a 21-inch CRT monitor (NEC, Accusync 120) with a screen  
124 resolution of 800 x 600 pixels and a refresh rate of 120 Hz, using the Cogent 2000 Toolbox  
125 (<http://www.vislab.ucl.ac.uk/cogent.php>) for Matlab (The Mathworks Inc., Natick, USA)  
126 running under Windows XP. Participants were seated in a comfortable armchair in an  
127 electrically shielded laboratory, with the head supported by a chin rest at a viewing distance  
128 of 57cm.

### 129 *Procedures*

130 The present study used a within-participant design with two levels of target awareness  
131 (*visible, invisible*) and two levels of spatial attention (*attended, ignored*). Two tasks with  
132 similar overall designs were employed to manipulate awareness and spatial attention.

133 *Awareness Task.* Participants were presented with two flickering image streams on either side  
134 of fixation (visual angle: 14°), as shown in *Figure 2* and *Movie 1*. Each image stream  
135 contained two consecutive intervals of 2.4 s duration (see *Stimulation Protocol* for interval  
136 details). One of the intervals in each image stream (randomized separately) contained signal  
137 (the ‘signal interval’) and the other interval contained noise only (the ‘noise interval’).  
138 Participants were asked to maintain fixation and report, on the cued side, which of the two  
139 intervals contained signal (two-interval forced-choice), while ignoring the non-cued side. The  
140 cue direction (left or right) was randomized for the first trial of each block and then alternated  
141 every eight trials.

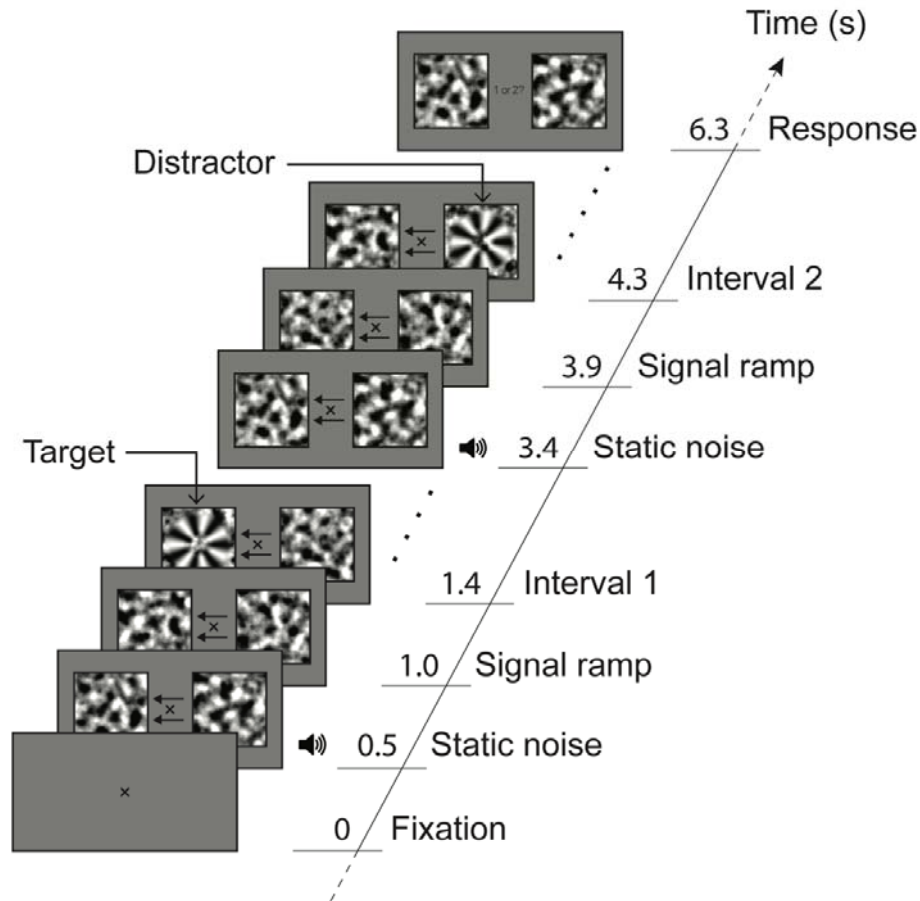

142

143 **Figure 2.** Awareness Task. Participants fixated centrally and searched for a signal embedded in  
144 dynamic noise on the cued side, which appeared in only one of two consecutive intervals. In the  
145 example shown, a target is present during interval 1 on the cued (left) side. Note that a distractor  
146 signal is also present during interval 2 on the ignored (right) side. Images flickered during the ramping  
147 and signal intervals only (see *Figure 1b* for typical image sequence).

148 Participants completed two versions of the Awareness Task. The first version was run at the  
149 beginning of the experiment (following practice with accuracy feedback), in order to set  
150 signal coherence levels for the subsequent Attention Task (see below). In this first version,  
151 participants completed 48 trials with feedback, while levels of signal coherence were adjusted  
152 according to an adaptive Quest staircase (Watson & Pelli, 1983) designed to approximate the  
153 maximum level of signal coherence that could not be detected by each participant (i.e. the  
154 invisible condition). Signal coherence for the visible condition was then set 40% higher than  
155 this level, as guided by psychometric functions fitted to pilot data. The second version of the



156 Awareness Task was run at the end of the experiment, to verify that appropriate levels of  
157 signal coherence had been selected. In this version, participants completed two blocks of 64  
158 trials (without feedback), with each image stream containing visible *or* invisible signal in one  
159 of the two consecutive intervals (randomized separately across trials).

160 *Attention Task.* Participants were again presented with two flickering image streams on either  
161 side of fixation, as shown in *Figure 3* and *Movie 2*. Unlike in the Awareness Task, however,  
162 in the Attention Task each image stream contained only one interval of 10 s duration per trial,  
163 and both image streams contained either visible or invisible signals (as per the staircase  
164 procedure above). Additionally, each image stream occasionally decreased in contrast before  
165 returning to normal across a 1 s period (ramping on and off linearly), with at least 1.5 s  
166 between peaks of contrast decreases (in either stream). Participants were asked to maintain  
167 fixation and report at the end of the trial how many contrast decreases (*targets*) occurred in  
168 the cued (*attended*) image stream. When the attended stream contained two contrast targets,  
169 the second target peaked between 7 s and 8.5 s into the trial, to encourage sustained attention  
170 throughout trials. Participants were allowed to practice the task (with feedback after each  
171 trial) before completing eight blocks of 64 test trials, with feedback provided between blocks.  
172 The percentage of contrast decrease was adjusted between blocks to maintain an approximate  
173 detection level of 65% (according to a 1 up / 2 down staircase with step sizes of 5%).

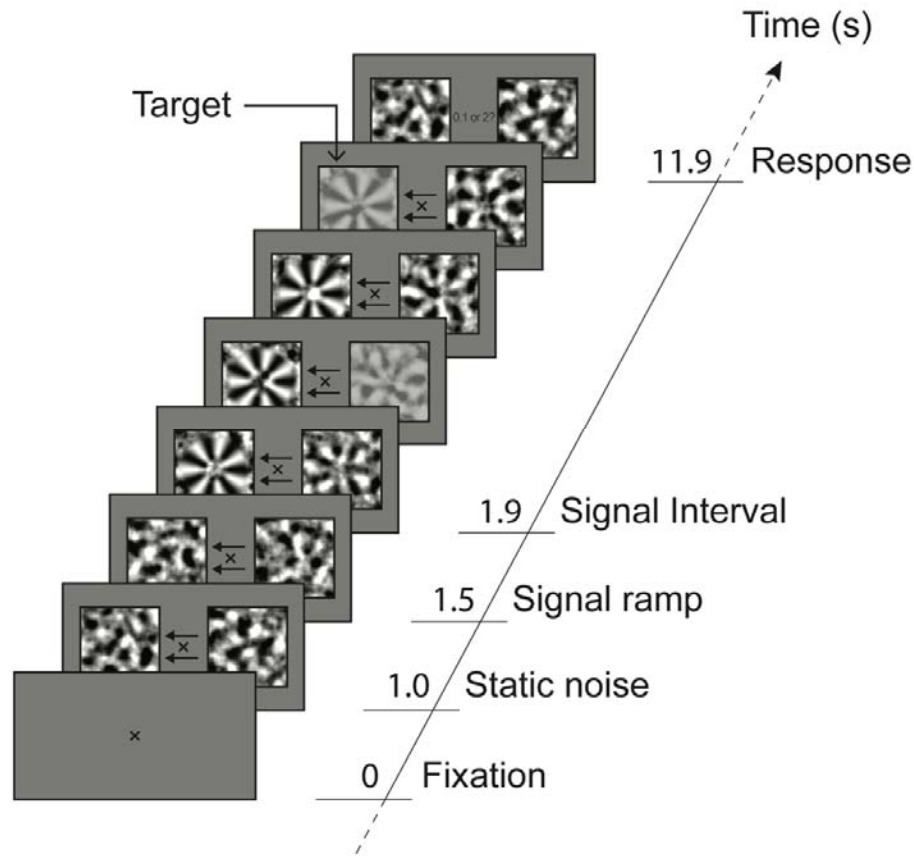

174

175 **Figure 3.** Attention Task. Participants fixated centrally and counted the number (0, 1 or 2) of brief  
176 decreases in contrast in the cued (attended) image stream. In the example shown, one contrast  
177 decrease appeared in each of the attended (left) and ignored (right) image streams. Each image  
178 stream contained a visible or invisible annulus embedded in dynamic noise throughout the entire  
179 signal interval. Note that for illustrative purposes the magnitude of the contrast decrements has been  
180 enhanced in the figure.

181 *Stimulation Protocol.* During any one trial, intervals in the left and right image streams  
182 flickered at unique frequencies (10 and 15 Hz, counterbalanced across trials). Although  
183 Awareness Task trials contained two intervals per image stream and Attention Task trials  
184 contained only one interval per image stream, the structure of intervals in both tasks was  
185 essentially the same. *Figure 4* shows the stimulation protocol for one interval flickering at 10  
186 Hz. All intervals began with 0.5 s of static noise, after which images flickered consecutively  
187 at the designated frequency (10 or 15 Hz). The phase distributions of all images in ‘noise  
188 intervals’ (Awareness Task) were completely scrambled (see Stimuli and apparatus). During  
189 ‘signal intervals’ (Awareness and Attention Tasks), images alternated between completely

190 phase-scrambled images (noise) and partially phase-scrambled images (signal). The  
191 coherence of signal images ramped up linearly during the first 0.4 s of signal intervals to  
192 eliminate involuntary capture of attention (*Figure 4*). At the end of the flicker duration (2.4 s  
193 for Awareness Task trials, 10.4 s for Attention Task trials), static noise was presented until  
194 the next interval began flickering (first interval of Awareness Task trials only) or the  
195 participant responded (Attention Task trials and second interval of Awareness Task trials).

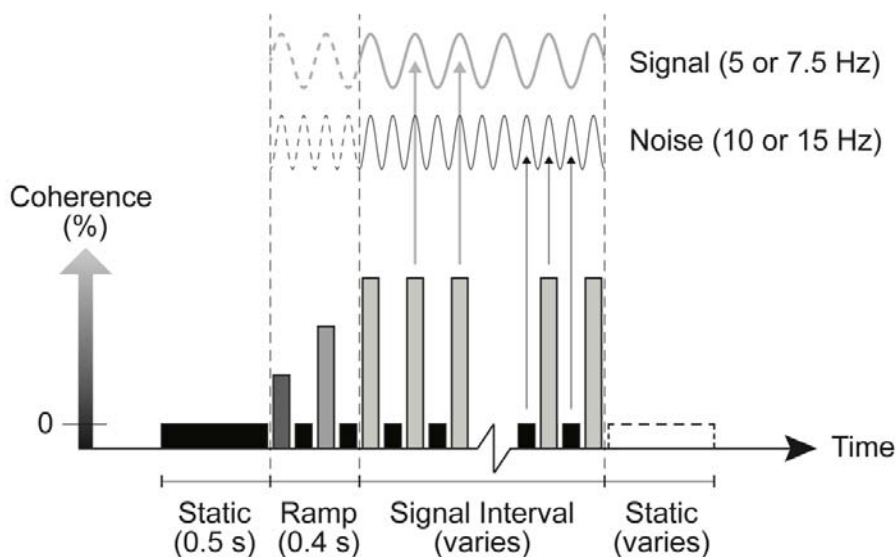

196

197 **Figure 4.** Schematic showing dynamic change in signal coherence during one interval of a single trial  
198 in which displays flickered at 10 Hz. Black bars represent images that were completely phase-  
199 scrambled (i.e., noise images with zero signal coherence), and light grey bars represent images that  
200 retained some level of signal structure (coherence) after the phase-scrambling procedure (*Figure 1b*).  
201 The coherence of signal images increased linearly during the ramping period (i.e., the first 0.4 s of  
202 each flickering interval), then remained at the specified level until the interval end (i.e., after 10 s in  
203 the Attention Task, and 2.4 s in the Awareness Task). Shown above the image sequence are putative  
204 neural responses driven by the signal and noise stimuli at distinct frequencies. Note that all images  
205 contain some amount of noise, and therefore contribute to the neural response at noise frequencies  
206 (10 Hz in this example, though in 50% of trials the noise frequency was 15 Hz). Only every second  
207 image contained consistent structure (the signal), and these images therefore contributed to neural  
208 responses at half the noise frequency (5 Hz in this example, but 7.5 Hz in the other 50% of trials).

209 Shown at the top of *Figure 4* are putative neural responses evoked by the stimulation  
210 protocol. Since all flickering images contained some amount of ‘noise’, SSVEP responses  
211 were expected to be elicited by noise stimuli at the *noise frequency* (i.e., 10 or 15 Hz).  
212 Crucially, since a signal was embedded in every second image during signal intervals, a

213 separate SSVEP was expected to be elicited at half the noise frequency in response to signal  
214 (5 or 7.5 Hz, the *signal frequency*). Thus, we were able to isolate neural responses to both  
215 noise and signal (at two levels of awareness) when those stimuli were either attended or  
216 ignored (see Results for details of power computation).

### 217 *EEG recording*

218 Participants were fitted with a 64 Ag-AgCl electrode EEG system (BioSemi Active Two:  
219 Amsterdam, Netherlands) after the initial Awareness Task, and EEG data were recorded  
220 during the Attention Task and final Awareness Task. Continuous data were recorded using  
221 BioSemi ActiView software (<http://www.biosemi.com>), and were digitized at a sample rate  
222 of 1024 Hz with 24-bit A/D conversion and a .01 – 208 Hz amplifier band pass. All scalp  
223 channels were referenced to the standard BioSemi reference electrodes, and electrode offsets  
224 were adjusted to be below 25  $\mu$ V before beginning the recording. Horizontal and vertical eye  
225 movements were recorded via pairs of BioSemi flat Ag-AgCl electro-oculographic electrodes  
226 placed to the outside of each eye, and above and below the left eye, and respectively.

### 227 *EEG data pre-processing*

228 Electroencephalography (EEG) recordings were processed offline using the Fieldtrip toolbox  
229 in Matlab (<http://fieldtrip.fcdonders.nl>). Trials containing horizontal eye movements were  
230 inspected manually and rejected if lateral eye fixations exceeded 1 s during the Attention  
231 Task (3.55% of trials) or 150ms during the final Awareness Task (12% of trials). Two faulty  
232 electrodes (across two participants) were interpolated using the nearest neighboring  
233 electrodes. Scalp electrode data were re-referenced to the average of all 64 electrodes,  
234 resampled to 256 Hz, and subjected to a surface Laplacian filter (M. Cohen, 2014). Trials  
235 were epoched into intervals containing signal at full coherence (Awareness Task: 1.4 – 3.4 s  
236 or 4.3 – 6.3 s, *Figure 2*; Attention Task: 1.9 s – 11.9 s, *Figure 3*), for frequency power

237 analyses (see Results). Attention Task trials were also epoched with an additional 2 s before  
238 and after each signal period for time-frequency power analyses.

### 239 *Phase-locked Power Calculation*

240 To measure neural responses to flickering stimuli in the Attention and Awareness Tasks, we  
241 examined *phase-locked power* (sometimes called ‘evoked’ power) at each of the noise (10  
242 and 15 Hz) and signal (5 and 7.5 Hz) stimulation frequencies. We elected to use phase-locked  
243 power as our measure of interest because it is maximally sensitive to neural responses in  
244 phase with the events of interest - in our case the onsets of flickering images - and parcels out  
245 these responses from non-phase-locked neural activity (sometimes called ‘induced’ power)  
246 that might otherwise obscure weak neural responses to invisible signals.

247 Phase-locked power was calculated as the difference between normalized *total power* and  
248 *non-phase-locked power* (Cohen, 2014). Total raw power was computed by applying Fourier  
249 transforms (Hanning window, 0.10 Hz frequency resolution) to 10 s trial epochs in the  
250 Attention Task (1.9 – 11.9 s: *Figure 3*) and 2 s interval epochs in the Awareness Task (1.4 –  
251 3.4 s and 4.3 – 6.3 s, *Figure 2*; zero-padded to 10 s), and averaging across trials in each  
252 condition of interest (attention, awareness, stimulation frequency and side). Total power in  
253 each condition was then decibel-normalized by dividing the raw power in each frequency bin  
254 by the average power in the 20 adjacent frequency bins (+/- 1.0 Hz) and multiplying the  
255 logarithmic transform of the result by 10 (M. Cohen, 2014). Non-phase-locked power was  
256 calculated in the same manner as total power, after the condition-average event-related  
257 potential had been subtracted from each trial (M. Cohen, 2014). Finally, phase-locked power  
258 (hereafter referred to as *power*) was calculated by subtracting the non-phase-locked power  
259 from the total power within each condition.

260 To test whether participants maintained covert attention during the Attention Task, we also  
261 calculated noise frequency power as a function of time. Preprocessed EEG data were  
262 bandpass filtered at each frequency of interest (Matlab function: fir1, order: 64 samples,  
263 width: .01 Hz), subjected to a Hilbert transform, and down-sampled to 40 Hz. Phase-locked  
264 time-frequency power was then calculated in the same manner as phase-locked frequency  
265 power (above).

266 To maximise power for all statistical analyses, we subjected the data to a contralateralization  
267 procedure to remove the side of stimulation (left or right of fixation) as a factor within each  
268 attention and awareness condition. The electrode labels in trials with right-sided stimulation  
269 (i.e., when stimuli on the right of fixation flickered at the frequency of interest) were  
270 mirrored along the sagittal centre-line (e.g., PO7 became PO8, and vice versa). After this  
271 procedure, left-sided electrodes in all trials (irrespective of stimulation side) represented  
272 those ipsilateral to stimulation, and right-sided electrodes represented those contralateral to  
273 stimulation. Since hemispheric differences were not crucial to our research question, we then  
274 collapsed power across the factor of stimulation side. All electrode topographies presented  
275 here (*Figures 6, 7, 8, and 10*) represent data that underwent this contralateralization  
276 procedure.

## 277 **Results**

### 278 *Awareness Task*

279 The initial adaptive staircase procedure produced an average signal coherence of 29.91% (SD  
280 = 3.18%) for the invisible condition and 69.91% (SD = 3.18%) for the visible condition,  
281 across participants. One-tailed t-tests were used to assess signal awareness in the final  
282 Awareness Task, which revealed that visible targets were detected above chance (chance =  
283 50%;  $M = 95.77\%$ ,  $SD = 3.64\%$ ,  $t_{(22)} = 60.367$ ,  $p < .001$ ) and that invisible targets were

284 detected no better than chance ( $M = 50.96\%$ ,  $SD = 8.13\%$ ,  $t_{(22)} = .565$ ,  $p = .289$ ).

285 Furthermore, Bayesian statistics supported the null hypothesis that invisible stimuli were

286 detected at chance (uniform prior, lower bound = 50%, upper bound = 100%,  $B = .07$ ).

### 287 *Attention Task*

288 One-tailed t-tests revealed that contrast decrement targets were detected better than chance

289 level (chance = 33%;  $M = 65.72\%$ ,  $SD = 6.77\%$ ,  $t_{(22)} = 46.302$ ,  $p < .001$ ). A two-tailed t-test

290 revealed that contrast decrement targets were better detected when the signal was visible ( $M$

291 = 68.11%,  $SD = 8.38\%$ ) than when it was invisible ( $M = 63.34\%$ ,  $SD = 5.71\%$ ,  $t_{(22)} = 4.84$ ,  $p$

292  $< .001$ ).

### 293 *Noise and Signal Elicit Distinct Neural Responses*

294 To confirm that our measure of phase-locked power successfully isolated neural responses to

295 signal and noise stimuli, we computed power in the Attention Task (see Methods) and

296 collapsed across awareness conditions and participants. *Figure 5* shows the phase-locked

297 power at contralateral electrode PO3/4 as a function of frequency, separately for each

298 combination of stimulation frequencies. Note that power is only greater than zero at the

299 signal (5 and 7.5 Hz) and noise (10 and 15 Hz) frequencies, confirming that the measure

300 successfully isolated neural responses to the flickering stimuli.

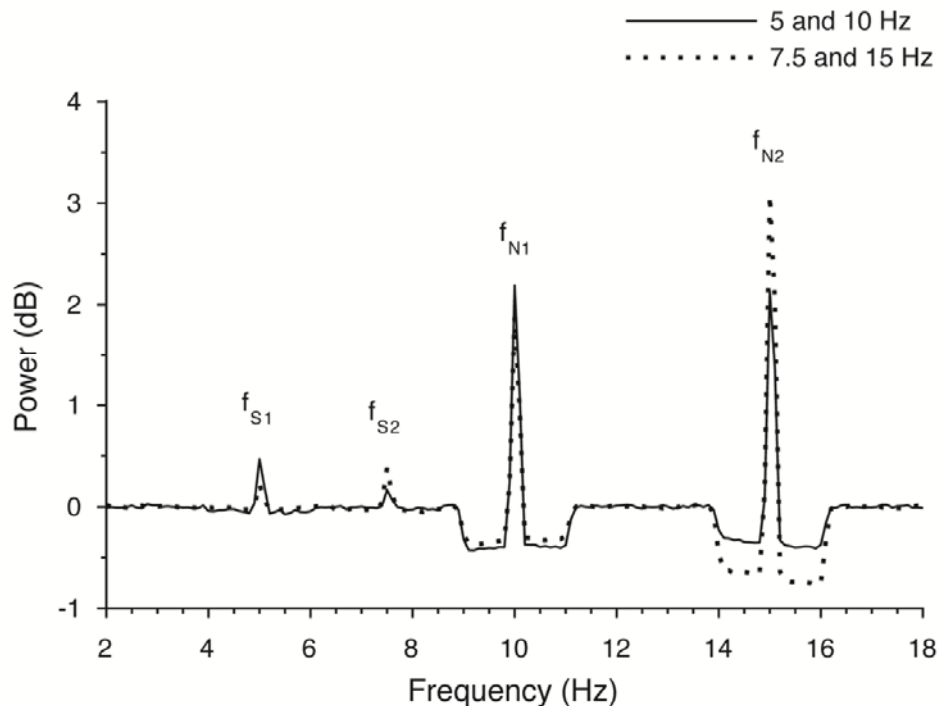

301

302 **Figure 5.** Phase-locked power at contralateral electrode PO3/4 in the Attention Task, averaged  
303 across all conditions and participants. Note that peaks in the frequency spectrum only occur at the  
304 signal (5 and 7.5 Hz) and noise frequencies (10 and 15 Hz).

### 305 *Spatial Attention Enhances Neural Representations of Noise*

306 To verify that covert attention was directed to the cued image stream (left or right)  
307 throughout Attention Task epochs, we assessed differences in time-frequency power between  
308 attended (cued) and ignored image streams. Time-frequency power was computed using  
309 Hilbert transforms (see Methods) and collapsed across noise frequencies and awareness  
310 conditions (since all stimuli contained noise). The effect of attention was then tested with a  
311 two-tailed Monte-Carlo cluster-based permutation test in the *Fieldtrip* toolbox for Matlab  
312 (between participant factors: electrode power and time, cluster  $p < .05$ , unit  $p < .05$ , 1000  
313 permutations). Cluster-based permutation analyses are a non-parametric method for testing  
314 condition differences in high-dimensional neural data, while correcting for multiple  
315 comparisons (for a detailed discussion, see Maris & Oostenveld, 2007). They are typically  
316 most useful when experimenters have few *a priori* expectations about specific locations or



317 times of effects (Groppe, Urbach, & Kutas, 2011), as was the case in the current  
318 investigation. As revealed in *Figure 6*, spatial attention enhanced noise frequency power  
319 across a cluster of posterior and contralateral electrodes that spanned the entire epoch  
320 (cluster-corrected  $p = .002$ ).

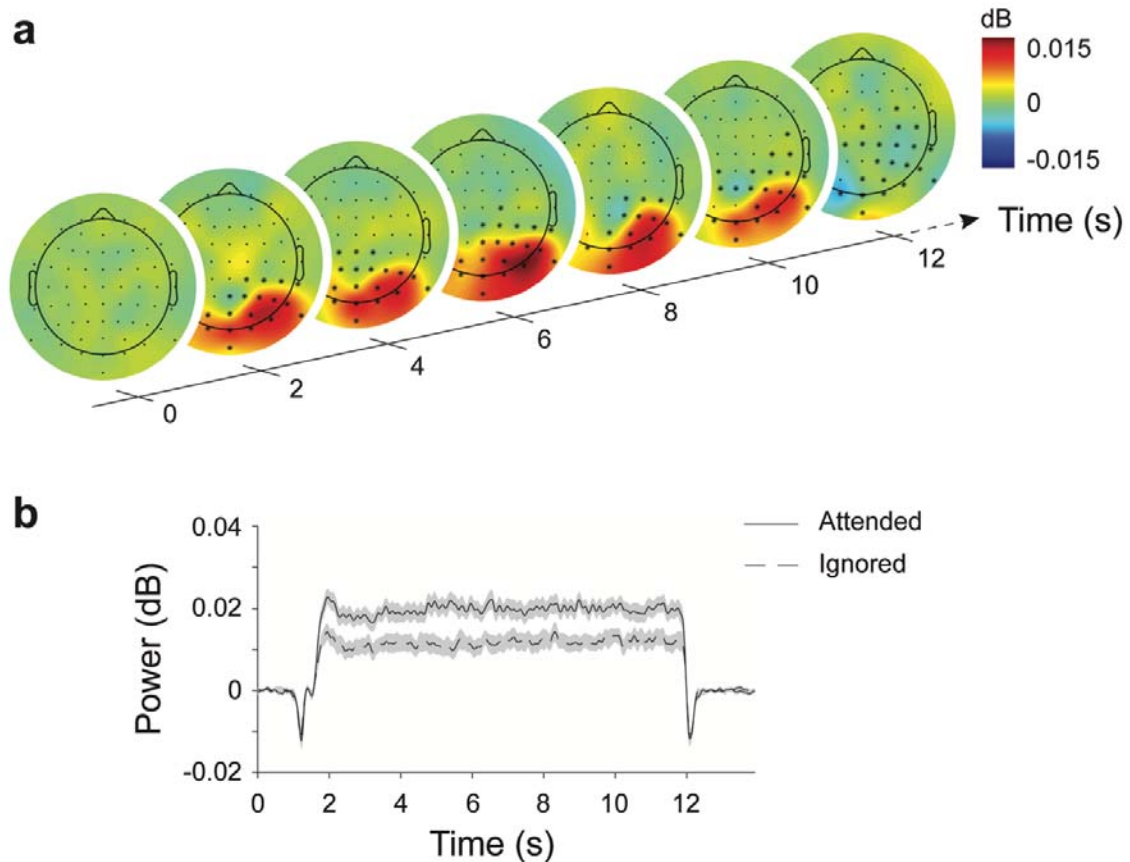

321  
322 **Figure 6.** Effect of spatial attention on the neural response to noise in the Attention Task. (a)  
323 Electrode topographies represent the difference between attended and ignored noise SSVEPs,  
324 contralateralized to represent left side stimulation, and collapsed across noise frequencies (10 and 15  
325 Hz). Stars indicate the cluster of electrodes that showed significantly greater noise frequency power  
326 with attention within  $\pm 1$  s of the displayed timepoint (cluster-corrected  $p < .001$ ). (b) Phase-locked  
327 power averaged across contralateral electrodes P1/2, P3/4, P5/6, P7/8, P9/10, PO3/4, PO7/8, and  
328 O1/2. Shaded regions indicate the within-subjects standard error of the mean.

### 329 *Target Detection Correlates with the Effect of Attention on Neural Representations of Noise*

330 Next, we investigated the relationship between behavioural performance on the Attention

331 Task and the effect of attention on neural representations of noise stimuli. We labelled trials

332 in which participants identified the exact number of targets (0, 1 or 2) as correct and all other  
333 trials as incorrect, and then balanced the number of correct and incorrect trials in each  
334 condition by removing a random subset of trials in the category with the greater number of  
335 trials. Noise frequency power was computed (see Methods) and collapsed across frequencies  
336 and sides, and the effect of attention was computed as the difference between attended and  
337 ignored trials (attended – ignored). Finally, the attentional modulation of correct and  
338 incorrect trials was compared with a two-tailed Monte-Carlo cluster-based permutation test  
339 (between participant factor: electrode power, cluster  $p < .05$ , unit  $p < .05$ , 1000  
340 permutations). As can be seen in *Figure 7*, there was a larger effect of attention on the neural  
341 response to noise stimuli across frontal and central electrodes when targets (contrast  
342 decrements) were correctly detected (cluster-corrected  $p = .014$ ).

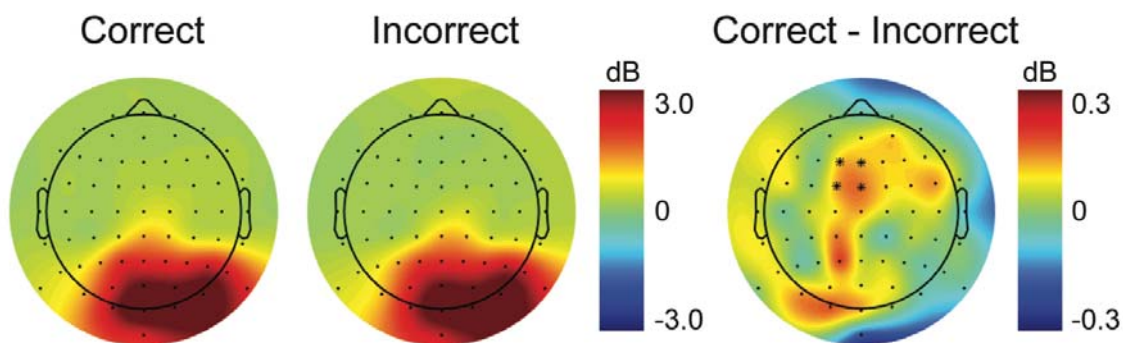

343  
344 **Figure 7.** Relationship between target detection and the effect of attention on the neural response to  
345 noise in the Attention Task. Electrode topographies are contralateralized to represent left side  
346 stimulation, and collapsed across noise frequencies (10 and 15 Hz). Stars indicate the cluster of  
347 electrodes that showed a significantly greater effect of attention during correct trials than incorrect  
348 trials (cluster-corrected  $p < .001$ ).

#### 349 *Invisible Signals Elicit Reliable Frequency Responses*

350 A central goal of our study was to determine whether invisible (and visible) signals elicit  
351 reliable SSVEPs. To do this we calculated power at the signal frequencies (5 and 7.5 Hz, see  
352 Methods) and collapsed across frequencies and attention conditions. We then compared the

353 electrode distributions to a zero power electrode distribution with a one-tailed Monte-Carlo  
354 cluster-based permutation test (between participant factor: electrode power, cluster  $p < .05$ ,  
355 unit  $p < .05$ , 1000 permutations), separately for each level of awareness. As revealed in  
356 *Figure 8*, signal frequency power during presentation of a visible signal was significantly  
357 greater than zero across a broad posterior and mostly contralateral cluster of electrodes  
358 (cluster-corrected  $p = .002$ ), confirming the presence of a neural response to visible signals.  
359 Crucially, signal frequency power during presentation of invisible signals was also  
360 significantly greater than zero across a cluster of posterior and mostly contralateral electrodes  
361 (cluster-corrected  $p = .002$ ), confirming the presence of a neural response to invisible signals.

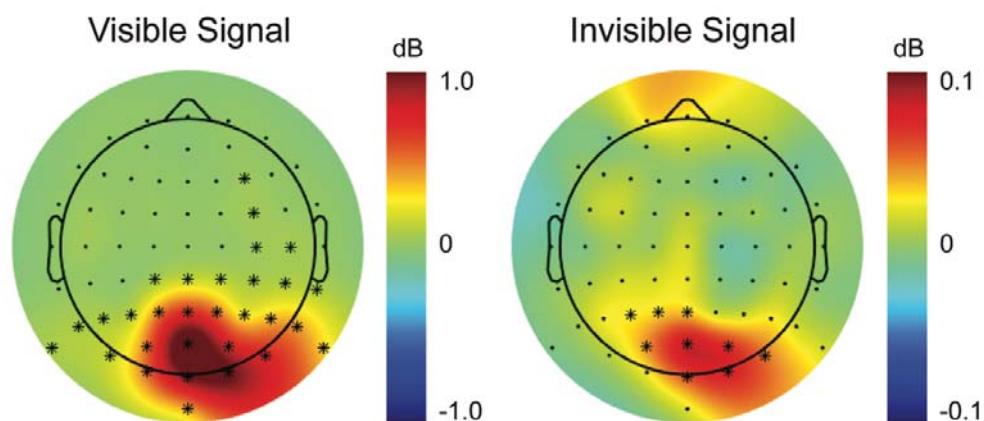

362  
363 **Figure 8.** Neural response to visible and invisible signals in the Attention Task. Electrode  
364 topographies represent SSVEP power in response to visible signals (left) and invisible signals (right),  
365 contralateralized to represent left side stimulation, and collapsed across attention conditions and  
366 signal frequencies (5 and 7.5 Hz). Stars indicate clusters of electrodes with significant signal relative  
367 to a zero power topography map (cluster-corrected  $p < .05$ ).

### 368 *Signal Frequency Responses Are Not Driven by Noise Stimuli*

369 As a control, we checked whether the neural activity observed at signal frequencies might  
370 reflect a neural response to noise stimuli at half the frequency of stimulation. To do this we  
371 computed frequency power in Awareness Task intervals (see Methods) and collapsed across  
372 the cluster of electrodes that showed a significant response to invisible stimuli in the

373 Attention Task (Pz, POz, Oz, PO3, PO4, contralateral PO7/8, contralateral O1/2, ipsilateral  
374 P1/2 and ipsilateral P3/4; see *Figure 8*), separately for intervals that contained signal and  
375 those that contained only noise (at each frequency of interest). As can be seen in *Figure 9*,  
376 Awareness Task intervals that contained signal (grey lines) elicited peaks in the frequency  
377 spectrum at signal frequencies (5 or 7.5 Hz), but intervals that contained only noise (black  
378 lines) produced no such activity. One-tailed *t*-tests demonstrated that signal frequency power  
379 was greater than zero during signal intervals ( $M = .08$  dB,  $SD = .07$  dB,  $t = 5.931$ ,  $p < .001$ ),  
380 but no greater than zero during noise-only intervals ( $M < .01$  dB,  $SD = .01$  dB,  $t = .965$ ,  $p =$   
381  $.172$ ). Crucially, Bayesian statistics supported the null hypothesis that noise stimuli produced  
382 no neural response at signal frequencies (uniform prior, lower bound = 0, upper bound = .08  
383 dB,  $B = .10$ ). This finding aligns with that of a previous study that used an analogous  
384 frequency tagging approach (Ales et al., 2012), which demonstrated no neural response at the  
385 signal frequency when participants were shown image sequences with noise images only.  
386 Together, these results confirm that the observed neural activity at signal frequencies in the  
387 Attention Task was driven by signal stimuli, and not a subharmonic response to noise stimuli.

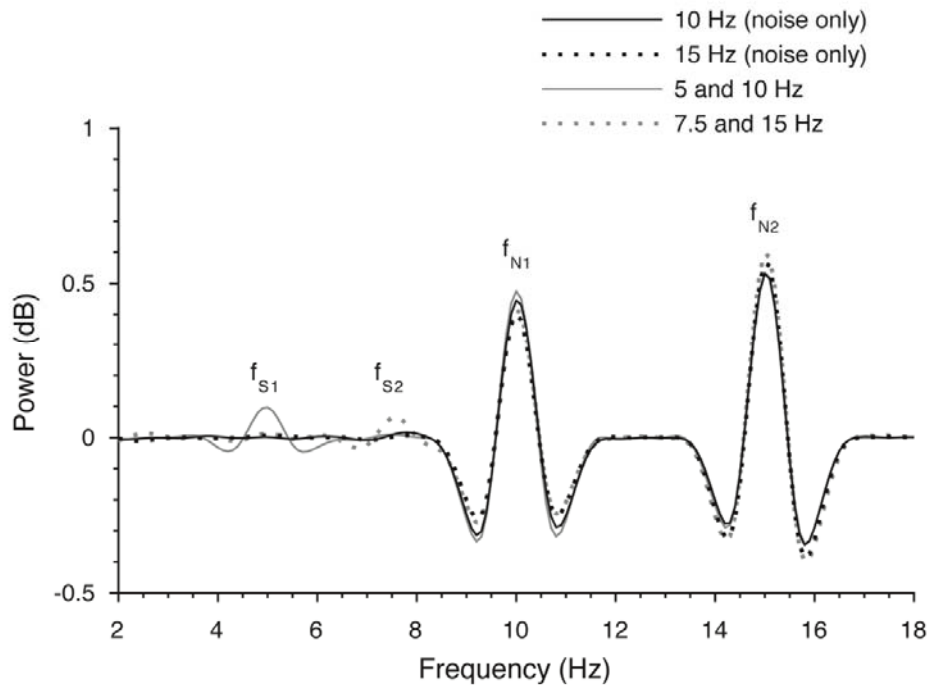

388

389 **Figure 9.** Phase-locked power in the Awareness Task, averaged across the cluster of electrodes that  
390 showed a significant response to invisible signal in the Attention Task (see *Figure 8*). Intervals that  
391 contained only noise at the frequency of interest are shown in black and intervals that contained both  
392 signal and noise are shown in grey. Note that noise-only intervals did not elicit peaks in the frequency  
393 spectrum at signal frequencies (5 and 7.5 Hz).

#### 394 *Attention Enhances Neural Representations of Visible and Invisible Signals*

395 Considering the weaker neural response to signals compared with high-contrast noise (*Figure*  
396 *5*), we collapsed power across posterior and contralateral clusters of electrodes that showed a  
397 significant response to the signal (*Figure 8*), separately for each level of awareness and  
398 attention. As revealed in *Figure 10*, attention increased the neural response to both visible  
399 and invisible signals across these electrode clusters. A two-way analysis of variance tested  
400 the effects of signal coherence (two levels: *visible, invisible*) and spatial attention (two levels:  
401 *attended, ignored*) on neural responses to signal. Results of the ANOVA revealed a main  
402 effect of signal coherence ( $F_{(1,22)} = 47.699, p < .001, \eta_p^2 = .68$ ), with greater neural responses  
403 to visible signals ( $M = .35$  dB,  $SD = .25$  dB) than to invisible signals ( $M = .05$  dB,  $SD = .05$   
404 dB). Spatial attention also increased neural responses to stimuli ( $F_{(1,22)} = 7.693, p = .011, \eta_p^2$

405 = .26), with significantly greater signal frequency power in response to attended signals ( $M =$   
406 .24 dB,  $SD = .16$  dB) than ignored signals ( $M = .16$  dB,  $SD = .16$  dB). The interaction  
407 between signal awareness and spatial attention was also significant ( $F_{(1,22)} = 4.768$ ,  $p = .040$ ,  
408  $\eta_p^2 = .18$ ). Follow-up paired-samples  $t$ -tests revealed that the interaction was driven by a  
409 greater effect of attention on visible signals ( $\Delta M = .11$  dB,  $\Delta SD = .19$  dB) than invisible  
410 signals ( $\Delta M = .04$  dB,  $\Delta SD = .08$  dB,  $t_{(22)} = 2.18$ ,  $p = .040$ ).

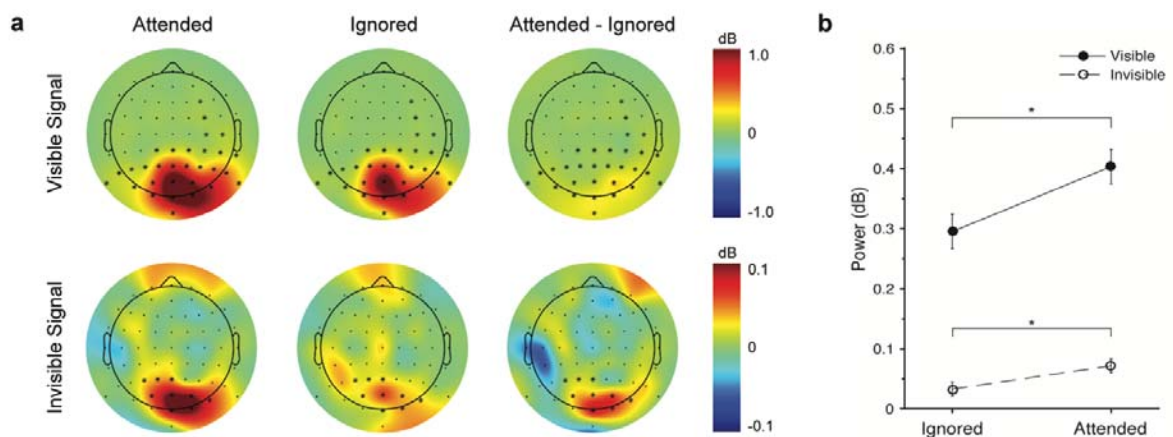

411  
412 **Figure 10.** Effect of attention on neural responses to visible (top) and invisible (bottom) signals in the  
413 Attention Task. (a) Electrode power topographies for attended signals (left), ignored signals (middle),  
414 and the difference between attended and ignored signals (right). Topographies are contralateralized  
415 to represent left side stimulation, and collapsed across signal frequencies (5 and 7.5 Hz). Stars  
416 indicate the electrodes showing significant signal (Figure 8), across which power was collapsed to  
417 investigate the effect of attention. (b) Effect of attention within each level of awareness, collapsed  
418 across electrodes showing significant signal. Attention significantly increased the neural response to  
419 both visible and invisible signals ( $p < .05$ ).

420 Since our critical research question related to whether attention can modulate neural  
421 responses to invisible stimuli, we also followed up the main effect of attention with  $t$ -tests of  
422 the simple main effect of spatial attention at each level of signal awareness (Figure 10b).  
423 Spatial attention enhanced neural responses to visible signals, with greater activity in  
424 response to attended ( $M = .40$  dB,  $SD = .26$  dB) than ignored visible stimuli ( $M = .30$  dB,  $SD$   
425  $= .27$  dB,  $t_{(22)} = 2.671$ ,  $p = .014$ ). This finding is in line with previous research showing  
426 attentional enhancement of SSVEPs to visible flickering stimuli (Vialatte, Maurice, Dauwels,

427 & Cichocki, 2010). Crucially, spatial attention also modulated neural responses to invisible  
428 signals, with significantly greater activity in response to attended ( $M = .07$  dB,  $SD = .07$  dB)  
429 than ignored invisible stimuli ( $M = .03$  dB,  $SD = .06$  dB,  $t_{(22)} = 2.363$ ,  $p = .027$ ), indicating  
430 that attention can also enhance neural representations of invisible stimuli embedded in highly  
431 salient noise.

## 432 **Discussion**

433 Previous research has suggested that covert spatial attention can modulate neural processing  
434 of invisible stimuli, supporting the notion that attention and awareness are dissociable neural  
435 mechanisms (Watanabe et al., 2011; Wyart et al., 2012; Wyart & Tallon-Baudry, 2008).  
436 Nevertheless, the intricacies of such a relationship remain poorly understood. In particular, no  
437 study to date has demonstrated that spatial attention can modulate *neural representations* of  
438 invisible stimuli, or assessed the nature of such modulation when those stimuli are in spatial  
439 competition with highly salient noise. To investigate these questions, we developed a novel  
440 attention task in which participants counted the number of brief contrast decreases in one of  
441 two image streams that contained both signals (visible or invisible) and noise. We isolated  
442 neural responses to noise in cued (attended) and non-cued (ignored) image streams, and  
443 observed enhanced activity across contralateral and posterior electrodes to cued noise  
444 throughout the trial epoch, confirming that participants voluntarily held their attention to one  
445 of the two lateralized image streams as instructed. The effect of attention on neural responses  
446 to noise was also greater across frontal and central electrodes with correct identification of  
447 contrast targets (*Figure 7*), suggesting that fluctuations in attention across trials directly  
448 affected target detection.

449 We employed a novel frequency tagging approach that allowed us to isolate neural  
450 representations of visible and invisible signals embedded in highly salient noise. To our

451 knowledge, this is the first study to report SSVEP responses to objectively invisible stimuli  
452 embedded in noise. It could be argued that since we did not measure signal awareness during  
453 the Attention Task, participants might have been aware of the ‘invisible’ signal. Although we  
454 cannot rule this out, such a scenario is highly unlikely, considering that participants actively  
455 searched for signals in the Awareness Task, but looked instead for contrast decrements  
456 during the Attention Task. Thus, our results suggest that awareness of a masked stimulus is  
457 not a prerequisite for eliciting an SSVEP, as might be inferred from the step-like rise in  
458 SSVEP power that coincided with the onset of signal awareness in a previous study (Ales et  
459 al., 2012). Instead, our findings demonstrate that SSVEPs track intermediate levels of signal  
460 strength, even at levels too weak to provoke conscious perception.

461 Critically, our paradigm allowed us to measure the effects of spatial attention on neural  
462 representations of visible and invisible signals. We found that neural representations of  
463 visible signals were greater in the attended image stream than in the ignored stream,  
464 extending previous findings of effects of attention on neural representations of visible stimuli  
465 (Hillyard & Anllo-Vento, 1998; Martinez et al., 1999; Müller et al., 1998) to demonstrate that  
466 spatial attention also benefits partially degraded, yet still visible, signals in spatial  
467 competition with clearly visible and highly salient noise. Crucially, neural responses to  
468 invisible signals were also greater in the attended image stream than in the ignored stream,  
469 demonstrating that spatial attention enhances representations of invisible stimuli in direct  
470 spatial competition with highly salient and visible noise. Since spatial attention enhanced  
471 neural representations of signals without a corresponding increase in signal awareness, the  
472 present findings support the notion that spatial attention and awareness are dissociable neural  
473 mechanisms (M. A. Cohen, Cavanagh, Chun, & Nakayama, 2012; Dehaene, Changeux,  
474 Naccache, Sackur, & Sergent, 2006; Koch & Tsuchiya, 2012; Tallon-Baudry, 2012).



475 Although the present study is not the first to demonstrate effects of spatial attention in the  
476 absence of object awareness (Schurger et al., 2008; Watanabe et al., 2011; Wyart et al., 2012;  
477 Wyart & Tallon-Baudry, 2008), it makes several important advances on the existing  
478 literature. First, the present study investigated a distinct question to that of previous studies  
479 that aimed to assess the effects of both awareness and attention on neural processing,  
480 independent of signal strength (Schurger et al., 2008; Wyart and Tallon-Baudry, 2008; Wyart  
481 et al., 2012). In these previous studies, signals were presented at detection threshold, and  
482 participants' subjective reports were used to categorise trials as visible or invisible. The  
483 authors found effects of attention on the neural processing of peri-threshold signals, even  
484 when participants reported being unaware of their presence. As such, these studies provide  
485 evidence that attention can modulate peri-threshold stimuli, but cannot speak to how the  
486 visual system treats very weak signals with insufficient bottom-up activation to enter  
487 awareness, irrespective of the cognitive state of the observer (so-called 'subliminal' stimuli,  
488 Dehaene et al., 2006). In the present study, we presented visible and invisible signals at  
489 different, pre-determined levels of coherence, and verified that invisible stimuli were  
490 objectively undetectable with a two-interval forced-choice signal detection task. Thus, we can  
491 be confident that the invisible stimuli in our experiment were not perceived due to a lack of  
492 bottom-up activation, rather than fluctuations in the cognitive state of the observer.  
493 Correspondingly, our findings demonstrate that neural processing of objectively subliminal  
494 stimuli can be modulated by spatial attention, as suggested by Dehaene and colleagues  
495 (2006), and that surpassing a hypothetical 'threshold' is not a necessary precursor for  
496 modulation by spatial attention.

497 Second, previous studies have not demonstrated that the observed neural activity, modulated  
498 by attention, was specifically related to the invisible stimuli in question. As such, previously  
499 observed effects of attention may instead reflect (a) baseline shifts in neuronal activity that

500 occur even in the absence of external driving stimuli (as may be the case in Watanabe et al.,  
501 2011; see Driver and Frith, 2000) (b) enhanced neural representations of other, visible stimuli  
502 (e.g. the spatial cue in Wyart et al., 2012, as has been argued by Cohen et al., 2012), or (c)  
503 subcomponents of spatial attention that do not modulate neural representations *per se* (e.g.  
504 spatial re-orienting after a miscued stimulus in Schurger et al., 2008; Wyart and Tallon-  
505 Baudry, 2008; Wyart et al., 2012). In demonstrating that spatial attention modulates specific  
506 neural correlates of invisible stimuli, without a corresponding increase in awareness, the  
507 present study provides the first clear evidence that spatial attention and awareness dissociate  
508 at the level of neuronal representations.

509 A third, and arguably most important, advance of the current study is that we have shown that  
510 spatial attention can enhance neural representations of invisible stimuli that are in direct  
511 spatial competition with highly salient, visible stimuli. Previous studies presented invisible  
512 signals alone (Schurger et al., 2008; Wyart & Tallon-Baudry, 2008), or at different times or  
513 locations (Watanabe et al., 2011; Wyart et al., 2012) to the salient masks used to titrate signal  
514 awareness. Since neural competition is maximal at the level of the receptive field (Beck &  
515 Kastner, 2009; Reynolds, Chelazzi, & Desimone, 1999), neural representations of invisible  
516 signals in these studies were likely under conditions of minimal competition. In contrast, we  
517 maximised competition between signal and noise by presenting them concurrently and at the  
518 same location. Our findings reveal concurrent neural representations of both visible and  
519 invisible stimuli at the same location, demonstrating that spatial competition with highly  
520 salient stimuli is not sufficient to suppress weak neural representations of invisible stimuli.  
521 Moreover, the present study demonstrates that weak neural representations of invisible  
522 stimuli in competition with salient stimuli can nevertheless be biased according to the top-  
523 down goals of the observer – in this case, holding covert attention preferentially to the left or  
524 right visual field. Given that signal features were irrelevant to the contrast detection task, this

525 finding suggests that all stimuli at attended locations are prioritised relative to those at  
526 unattended locations, irrespective of their task-relevance, their capacity to enter awareness, or  
527 their proximity to more salient stimuli.

528 The present findings demonstrate that spatial attention can operate independent of  
529 mechanisms of awareness, at the level of neural representations. More broadly, the present  
530 findings place spatial attention within a growing body of literature that suggests various  
531 forms of attention (e.g., temporal, feature-based, and involuntary spatial attention) can  
532 operate in the absence of stimulus awareness (for a review, see Koch & Tsuchiya, 2007).  
533 Together, these findings argue against the idea that attention and awareness are identical  
534 (Prinz, 2012) and instead support theories that cast attention and awareness as dissociable  
535 mechanisms (M. A. Cohen et al., 2012; Dehaene et al., 2006; Koch & Tsuchiya, 2012;  
536 Tallon-Baudry, 2012). Nevertheless, the exact nature of this relationship remains to be fully  
537 characterized, in particular whether the different forms of attention interact with awareness  
538 according to the same underlying principles, and how such top-down biases interact with  
539 bottom-up processes related to salience and neural competition between representations. To  
540 this end, we anticipate that the present paradigm could be adapted to study how other non-  
541 spatial forms of attention (e.g., feature-based attention) modulate neural representations of  
542 multiple competing stimuli at different levels of awareness.

## 543 **References**

- 544 Ales, J. M., Farzin, F., Rossion, B., & Norcia, A. M. (2012). An objective method for measuring face detection  
545 thresholds using the sweep steady-state visual evoked response. *Journal of Vision*, *12*(10), 1–18.  
546 <http://doi.org/10.1167/12.10.18>
- 547 Beck, D. M., & Kastner, S. (2009). Top-down and bottom-up mechanisms in biasing competition in the human  
548 brain. *Vision Research*, *49*(10), 1154–1165. <http://doi.org/10.1016/j.visres.2008.07.012>
- 549 Broadbent, D. E. (1958). *Perception and Communication*. *Perception and communication*. Oxford: Pergamon  
550 Press. <http://doi.org/10.1037/10037-001>
- 551 Cohen, M. (2014). *Analyzing Neural Time Series Data. Theory and Practice*. Cambridge, MA: MIT Press.

- 552 Cohen, M. A., Cavanagh, P., Chun, M. M., & Nakayama, K. (2012). The attentional requirements of  
553 consciousness. *Trends in Cognitive Sciences*, *16*(8), 411–417. <http://doi.org/10.1016/j.tics.2012.06.013>
- 554 Dehaene, S., Changeux, J.-P., Naccache, L., Sackur, J., & Sergent, C. (2006). Conscious, preconscious, and  
555 subliminal processing: A testable taxonomy. *Trends in Cognitive Sciences*, *10*(5), 204–211.  
556 <http://doi.org/10.1016/j.tics.2006.03.007>
- 557 Desimone, R., & Duncan, J. (1995). Neural mechanisms of selective visual attention. *Annual Review of*  
558 *Neuroscience*, *18*(1), 193–222. <http://doi.org/10.1146/annurev.ne.18.030195.001205>
- 559 Driver, J., & Frith, C. (2000). Shifting baselines in attention research. *Nature Reviews Neuroscience*,  
560 *1*(November), 147–148. <http://doi.org/10.1038/35039083>
- 561 Groppe, D. M., Urbach, T. P., & Kutas, M. (2011). Mass univariate analysis of event-related brain  
562 potentials/fields I: A critical tutorial review. *Psychophysiology*, *48*, 1711–1725.  
563 <http://doi.org/10.1111/j.1469-8986.2011.01273.x>
- 564 Hillyard, S. A., & Anllo-Vento, L. (1998). Event-related brain potentials in the study of visual selective  
565 attention. *Proceedings of the National Academy of Sciences of the United States of America*, *95*(3), 781–  
566 787. <http://doi.org/10.1073/pnas.95.3.781>
- 567 Koch, C., & Tsuchiya, N. (2007). Attention and consciousness: Two distinct brain processes. *Trends in*  
568 *Cognitive Sciences*, *11*(1), 16–22. <http://doi.org/10.1016/j.tics.2006.10.012>
- 569 Koch, C., & Tsuchiya, N. (2012). Attention and consciousness: Related yet different. *Trends in Cognitive*  
570 *Sciences*, *16*(2), 103–104. <http://doi.org/10.1016/j.tics.2011.11.012>
- 571 Maris, E., & Oostenveld, R. (2007). Nonparametric statistical testing of EEG- and MEG-data. *Journal of*  
572 *Neuroscience Methods*, *164*(1), 177–190. <http://doi.org/10.1016/j.jneumeth.2007.03.024>
- 573 Martinez, A., Anllo-Vento, L., Sereno, M. I., Frank, L. R., Buxton, R. B., Dubowitz, D. J., ... Hillyard, S. A.  
574 (1999). Involvement of striate and extrastriate visual cortical areas in spatial attention. *Nature*  
575 *Neuroscience*, *2*(4), 364–369. <http://doi.org/10.1038/7274>
- 576 Müller, M. M., Picton, T. W., Valdes-Sosa, P., Riera, J., Teder-Sälejärvi, W. A., & Hillyard, S. A. (1998).  
577 Effects of spatial selective attention on the steady-state visual evoked potential in the 20 – 28 Hz range.  
578 *Cognitive Brain Research*, *6*, 249–261. [http://doi.org/10.1016/S0926-6410\(97\)00036-0](http://doi.org/10.1016/S0926-6410(97)00036-0)
- 579 Norcia, A. M., Appelbaum, L. G., Ales, J. M., Cottareau, B. R., & Rossion, B. (2015). The steady-state visual  
580 evoked potential in vision research: A review. *Journal of Vision*, *15*(6), 1–46.  
581 <http://doi.org/10.1167/15.6.4>
- 582 Prinz, J. J. (2012). *The conscious brain: How attention engenders experience*. New York, NY: Oxford  
583 University Press.
- 584 Regan, D. (1966). Some characteristics of average steady-state and transient responses evoked by modulated  
585 light. *Electroencephalography and Clinical Neurophysiology*, *20*(3), 238–248.  
586 [http://doi.org/10.1016/0013-4694\(66\)90088-5](http://doi.org/10.1016/0013-4694(66)90088-5)
- 587 Reynolds, J. H., Chelazzi, L., & Desimone, R. (1999). Competitive mechanisms subserve attention in macaque  
588 areas V2 and V4. *The Journal of Neuroscience*, *19*(5), 1736–1753.  
589 <http://doi.org/10.1523/JNEUROSCI.19-05-01736.1999>
- 590 Schurger, A., Cowey, A., Cohen, J. D., Treisman, A., & Tallon-Baudry, C. (2008). Distinct and independent  
591 correlates of attention and awareness in a hemianopic patient. *Neuropsychologia*, *46*(8), 2189–97.  
592 <http://doi.org/10.1016/j.neuropsychologia.2008.02.020>

- 593 Tallon-Baudry, C. (2012). On the neural mechanisms subserving consciousness and attention. *Frontiers in*  
594 *Psychology*, 2(January), 1–11. <http://doi.org/10.3389/fpsyg.2011.00397>
- 595 Vialatte, F.-B., Maurice, M., Dauwels, J., & Cichocki, A. (2010). Steady-state visually evoked potentials: Focus  
596 on essential paradigms and future perspectives. *Progress in Neurobiology*, 90(4), 418–438.  
597 <http://doi.org/10.1016/j.pneurobio.2009.11.005>
- 598 Watanabe, M., Cheng, K., Murayama, Y., Ueno, K., Asamizuya, T., Tanaka, K., & Logothetis, N. (2011).  
599 Attention but not awareness modulates the BOLD signal in the human V1 during binocular suppression.  
600 *Science*, 334(6057), 829–831. <http://doi.org/10.1126/science.1203161>
- 601 Watson, A. B., & Pelli, D. G. (1983). Quest: A Bayesian adaptive psychometric method. *Perception &*  
602 *Psychophysics*, 33(2), 113–120. <http://doi.org/10.3758/BF03202828>
- 603 Wyart, V., Dehaene, S., & Tallon-Baudry, C. (2012). Early dissociation between neural signatures of  
604 endogenous spatial attention and perceptual awareness during visual masking. *Frontiers in Human*  
605 *Neuroscience*, 6(16), 1–14. <http://doi.org/10.3389/fnhum.2012.00016>
- 606 Wyart, V., & Tallon-Baudry, C. (2008). Neural dissociation between visual awareness and spatial attention.  
607 *Journal of Neuroscience*, 28(10), 2667–2679. <http://doi.org/10.1523/JNEUROSCI.4748-07.2008>

## 608 **Supplementary Material**

609 **Movie 1.** Example trial of the Awareness Task. At the beginning of the trial, static noise images  
610 appear on either side of fixation, and central arrows indicate the image stream to be attended (in this  
611 example, the left stream). After 0.5 s the image streams flicker for the first 2.4 s interval, are static for  
612 another 0.5 s, and then flicker again for the second 2.4 s interval. On the cued (left) side, one of the  
613 two flickering intervals contains signal embedded in every second image (in this example, the second  
614 interval), the coherence of which increases linearly during the first 0.4 s of the interval. Signal is also  
615 present in one of the two intervals on the non-cued (right) side (in this example, the first interval).

616 **Movie 2.** Example trial of the Attention Task. At the beginning of the trial, static noise images appear  
617 on either side of fixation, and central arrows indicate the image stream to be attended (in this  
618 example, the left stream). After 0.5 s the image streams flicker for 10.4 s. At the end of the trial  
619 participants report how many times the cued (left) image stream decreased in contrast (in this  
620 example, twice). The non-cued image stream also contains up to two contrast decrements (two in this  
621 example). Both image streams contain signal embedded in every second image, the coherence of  
622 which increases linearly during the first 0.4 s of flicker to a level that is either visible or invisible to the  
623 participant (in this example, the left image stream contains visible signal and the right image stream  
624 contains invisible signal).
